# Supplementary material for: Design of interfacial dual Schottky junctions to modulate charge transfer for enhanced piezo-assisted photocatalytic degradation RhB performances
Source: Royal Society of Chemistry journal article supplement (doi:10.1039/d4ta00619d), 2024-01-01
Supplement: d4ta00619d1.pdf [file d4ta00619d1.pdf]

## Supporting Information

# Design of Interfacial Dual Schottky Junctions to Modulate Charge Transfer for Enhanced Piezo-assisted Photocatalytic Degradation RhB Performances

Xiaoqi Jiang<sup>a</sup>, Shengdong Sun<sup>a</sup>, Yuqiao Wang<sup>b\*</sup>, Lebing Zhao<sup>a</sup>, Fangzhi Huang<sup>a</sup>, Shikuo Li<sup>a\*</sup>

<sup>a</sup>Photoelectric Conversion Energy Materials and Devices Key Laboratory of Anhui Province, Key Laboratory of Structure and Functional Regulation of Hybrid Materials (Anhui University) Ministry of Education, School of Material Science and Engineering & School of Chemistry and Chemical Engineering, Anhui University, Hefei, 230601, P. R. China.

<sup>b</sup>School of Chemistry and Chemical Engineering, Southeast University, Nanjing 211189, China.

\*Corresponding authors. E-mail: yqwang@seu.edu.cn, hfz@ahu.edu.cn, lishikuo@ahu.edu.cn; Tel: +86-551-63861328

### Catalogue

|                                                                                 |     |
|---------------------------------------------------------------------------------|-----|
| 1 Materials .....                                                               | S2  |
| 2 Experimental.....                                                             | S2  |
| 2.1 Synthesis of hollow Bi <sub>2</sub> WO <sub>6</sub> nanoflower spheres..... | S2  |
| 2.2 Synthesis of Bi <sub>2</sub> WO <sub>6</sub> @Ag.....                       | S2  |
| 2.3 Synthesis of Bi <sub>2</sub> WO <sub>6</sub> @Ag/MXene.....                 | S2  |
| 2.4 Photoelectrochemical measurements.....                                      | S2  |
| 2.5 Piezo-photocatalytic activity experiments.....                              | S2  |
| 2.6 Free radical capture experiment.....                                        | S2  |
| 2.7 Numerical simulations.....                                                  | S2  |
| 3 Characterization .....                                                        | S2  |
| 4. Supplementary figures.....                                                   | S3  |
| 5. Supplementary tables.....                                                    | S18 |
| References:.....                                                                | S21 |

## 1 Materials

All chemical reagents were purchased from Sinopharm Chemical Reagent Co., Ltd, and used as received, without any further purification.

## 2 Experimental

### 2.1 Synthesis of hollow $\text{Bi}_2\text{WO}_6$ nanoflower spheres

0.97 g  $\text{Bi}(\text{NO}_3)_3 \cdot 5\text{H}_2\text{O}$  was dissolved in 20 mL ethylene glycol, then slowly added 20 mL 0.33 g  $\text{Na}_2\text{WO}_4 \cdot 2\text{H}_2\text{O}$  ethanol solution and stirred for 1 h. Transfer the mixed solution to the autoclave and keep it in 160 °C for 6 h. After cooling, the obtained samples were washed with deionized water. Afterwards, the obtained sample was calcinated at 400 °C for 1 h in air atmosphere.

### 2.2 Synthesis of $\text{Bi}_2\text{WO}_6@Ag$

Ag nanoparticles were deposited using photoreduction method. Specifically, 0.4 g  $\text{Bi}_2\text{WO}_6$  was dispersed in 50 mL  $\text{H}_2\text{O}$  and 5 mL  $\text{CH}_3\text{OH}$ . Subsequently, a certain amount of  $\text{AgNO}_3$  aqueous solution (1.5, 3, 4.5 mL) was added and placed under UV light for 20 min (the sample records were  $\text{BWO}@Ag_{1.5}$ ,  $\text{BWO}@Ag_3$  and  $\text{BWO}@Ag_{4.5}$ . Specifically,  $\text{BWO}@Ag_3$  recorded as  $\text{BWO}@Ag$ ).

### 2.3 Synthesis of $\text{Bi}_2\text{WO}_6@Ag/\text{MXene}$

Ultra-thin MXene ( $\text{Ti}_3\text{C}_2\text{T}_x$ ) was synthesized according to the method reported in the previous literature.<sup>1</sup> Then, 3 mL of ultra-thin MXene solution was mixed with 50 mg  $\text{Bi}_2\text{WO}_6@Ag$ , and the sample was obtained by centrifugation after static 10 min.

### 2.4 Photoelectrochemical measurements

Photoelectrochemical (PEC) measurements were carried out in 0.5 M  $\text{Na}_2\text{SO}_4$  solution (pH=6.8) on an electrochemical workstation (CHI 660E) with a standard three-electrode configuration (The as-prepared sample as working electrode Pt coil as counter electrode,  $\text{Ag}/\text{AgCl}$  as reference electrode). The light intensity applied during the test was 100 mW  $\text{cm}^{-2}$ . Electrochemical impedance spectroscopy (EIS) was performed by using of Zahner IM6.

### 2.5 Piezo-photocatalytic activity experiments

In this work, RhB dye molecules were selected as the target contaminants. Typically, the as-prepared 20 mg photocatalyst sample was placed in 50 mL of 10 mg  $\text{L}^{-1}$  RhB aqueous solution. Before the reaction, stir in the dark for 30 min to allow the system to reach adsorption/desorption equilibrium. Full-spectrum illumination ( $\lambda > 380$  nm, 100 mW  $\text{cm}^{-2}$ ) and ultrasound (100 W, 40 kHz) were applied during the reaction. The degradation efficiency was evaluated by the UV absorption intensity of the solution after the reaction.

### 2.6 Free radical capture experiment

Electron spin resonance (ESR) technique was used to measure free radicals. DMPO (5,5-dimethyl-1-pyrroline-N-oxide) was selected as the trapping agent. The visible light was provided for a 300W xenon lamp (100 mW  $\text{cm}^{-2}$ ). In a typical procedure, 10 mg of synthesized sample was suspended in Milli-Q water (for detection of  $\cdot\text{OH}$ ) or methanol (for detection of  $\cdot\text{O}_2^-$ ). Then, 10  $\mu\text{L}$  of DMPO was added, and the signal was tested under dark or visible light (10 min) conditions, respectively.

### 2.7 Numerical simulations

Finite element analysis was conducted using the piezoelectric device module in COMSOL Multiphysics. To simplify the model, the diameter of the  $\text{Bi}_2\text{WO}_6$  sphere was set to 2  $\mu\text{m}$  and the thickness of the nanosheet was set to 300 nm, the diameter of the Ag particles was set to 40 nm. The MXene nanosheet was set to 500 nm. The pressure generated by bubble bursting generated by ultrasonic was set to 100 Mpa.

### **3 Characterization**

The surface morphology and lattice structure of the samples were observed using a Zeiss Supra 40 scanning electron microscope (SEM), and JEM-2010 transmission electron microscope (TEM). The crystal structures of the sample were performed on a Philips X'Pert PRO SUPER X-ray diffractometer (XRD). The piezoelectric properties of the samples were investigated by piezoelectric response force microscopy (PFM). Elemental displacements of the samples were investigated on ESCALAB 250 Xijing X-ray photoelectron spectroscopy (XPS). The transient time resolved PL decay measurements were recorded on a FS5 fluorescence spectrometer. Elemental content was measured using the Thermo Fisher Inductively Coupled Plasma Optimization Spectrometer iCAP7400 (ICP-OES).

#### 4 Supplementary Figures

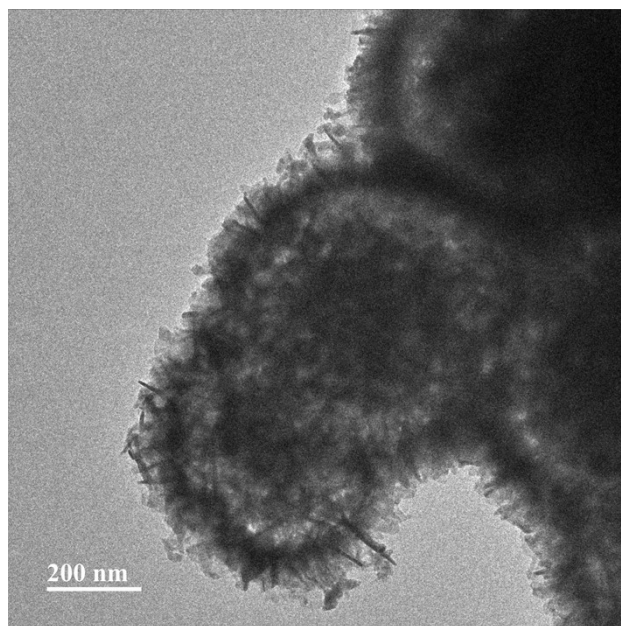

**Figure S1.** TEM image of Bi<sub>2</sub>WO<sub>6</sub>@Ag.

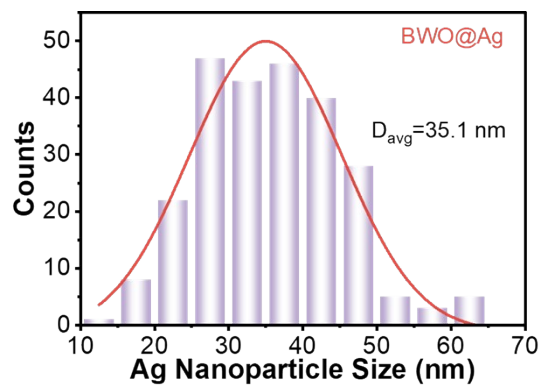

**Figure S2.** The size distribution of Ag nanoparticles.

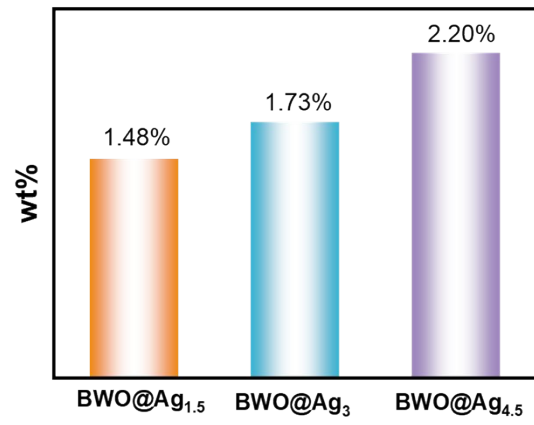

**Figure S3.** ICP-OES of the BWO@Ag<sub>1.5-4.5</sub>.

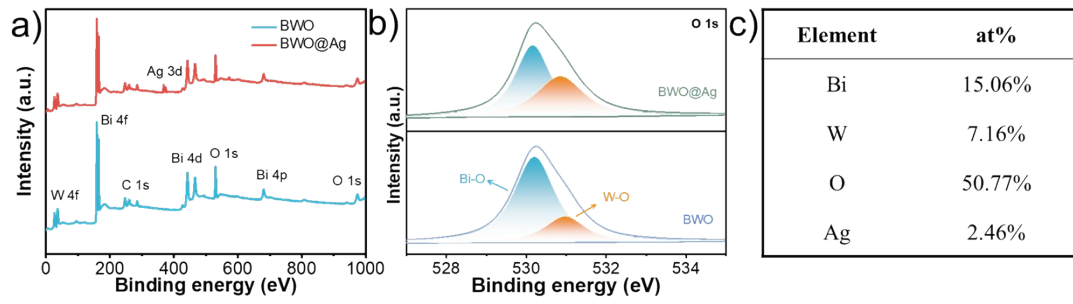

**Figure S4.** High resolution XPS spectra: full XPS spectra (a), O1s (b) of BWO and BWO@Ag samples. Atomic ratio of elements in BWO@Ag sample (c).

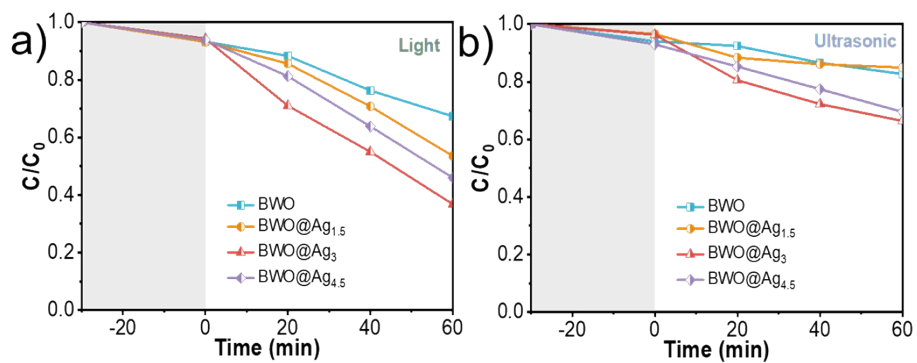

**Figure S5.** RhB degradation performance under different conditions: light illumination (a) and ultrasound (b).



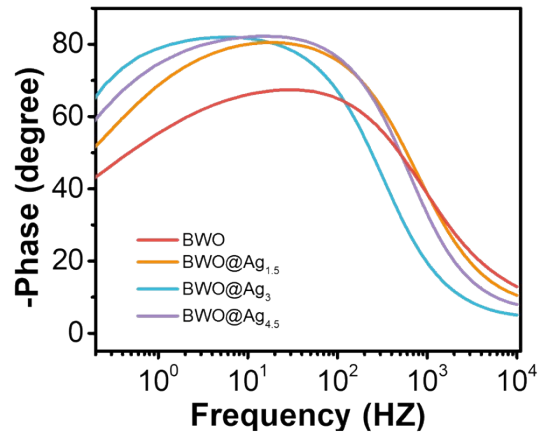

Figure S6. Bode plot of BWO and BWO@Ag samples.

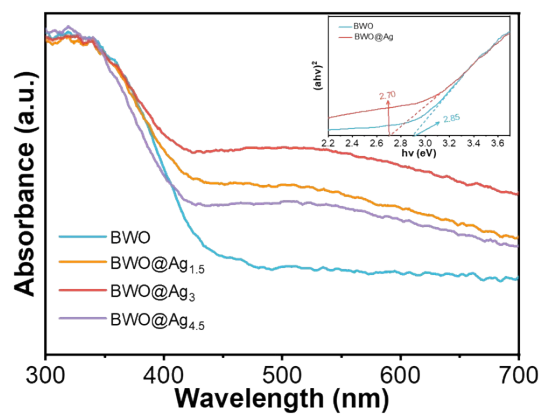

Figure S7. UV-vis spectra of BWO and BWO@Ag samples.

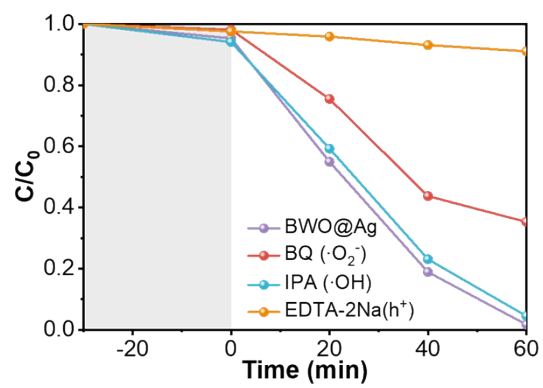

**Figure S8.** RhB degradation efficiency with different capture agents.

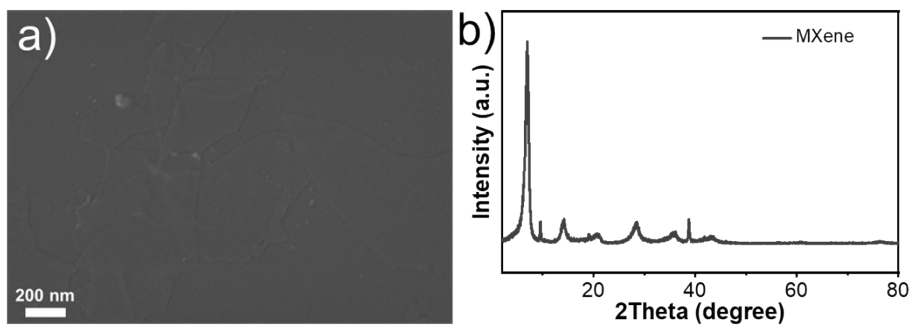

**Figure S9.** SEM image (a) and XRD pattern (b) of the MXene.

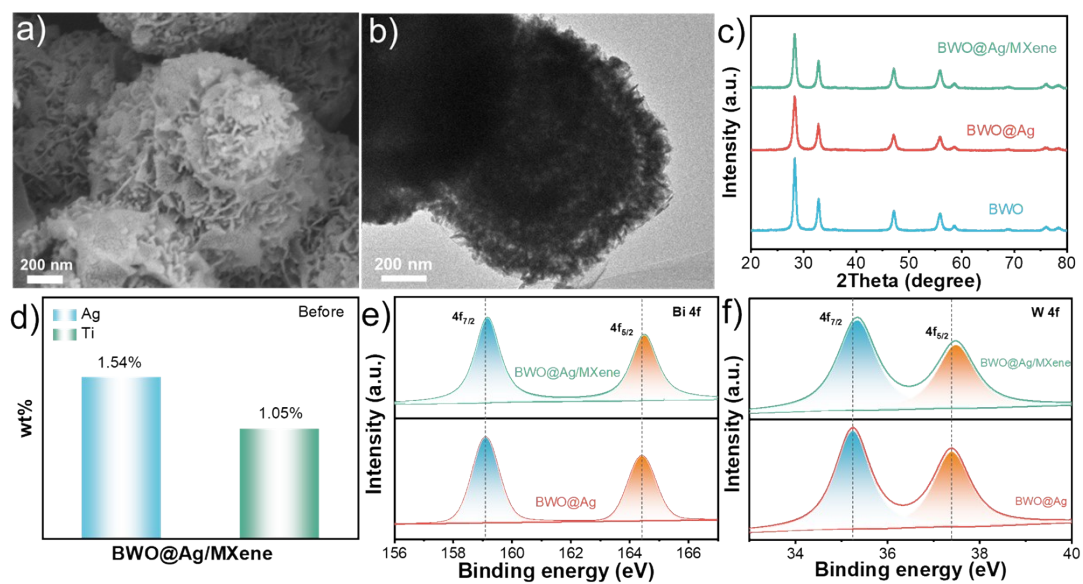

**Figure S10.** SEM image (a), HRTEM image (b) of the BWO@Ag/MXene sample. XRD pattern (c) of the BWO, BWO@Ag and BWO@Ag/MXene samples. ICP-OES (d) of the BWO@Ag/MXene sample. High resolution XPS spectra of Bi 4f (e) and W 4f (f) for BWO@Ag and BWO@Ag/MXene samples.

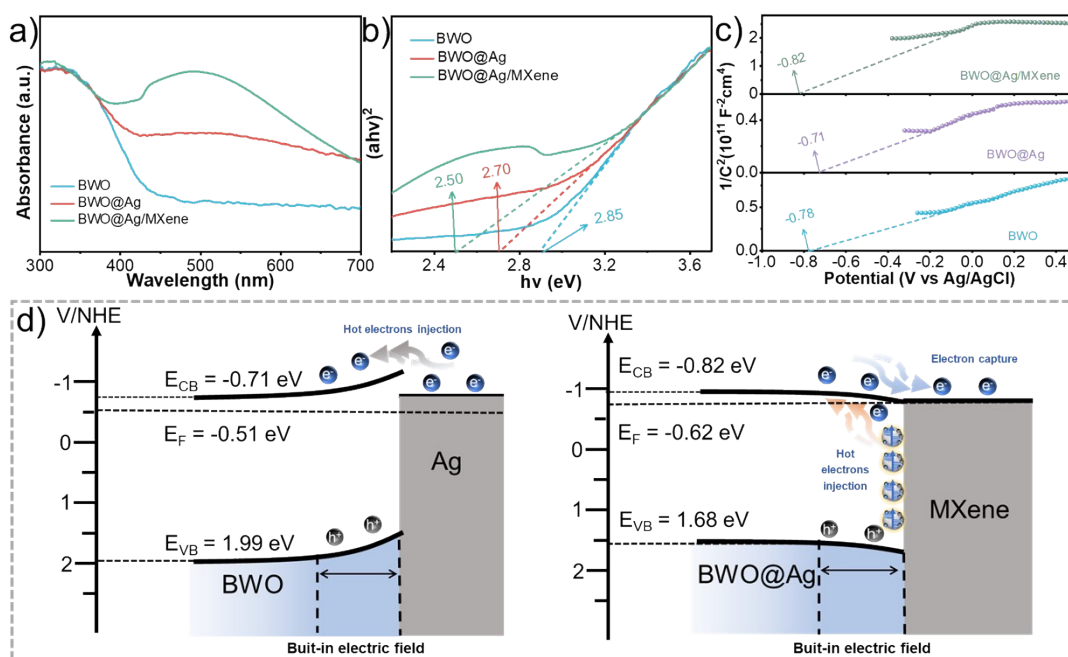

**Figure S11.** UV-vis spectra (a),  $E_g$  (b), M-S curves (c) of BWO, BWO@Ag and BWO@Ag/MXene. Energy band positions of BWO@Ag and BWO@Ag/MXene samples (d).

The band gaps of the samples calculated according to Figure S11a were 2.85 eV (BWO), 2.70 eV (BWO@Ag) and 2.5 eV (BWO@Ag/MXene). Meanwhile, the Fermi energy levels ( $E_f$ ) calculated by M-S curve were -0.58 V vs NHE, -0.51 V vs NHE and -0.62 V vs NHE (Figure S11b). As shown in Figure S11c,  $E_f$  (BWO) was higher than  $E_f$  (BWO@Ag). The electrons of BWO will be transferred to Ag to balance the electron energy between the two materials. During the equilibrium process, the energy band of BWO will bend upward to form Schottky barrier (Figure S11d). Similarly, MXene has typical metal-like properties. During the electron energy balance process, the electrons of MXene will be transferred to BWO, and the energy band of BWO will bend downward to form Schottky barrier (Figure S11d).

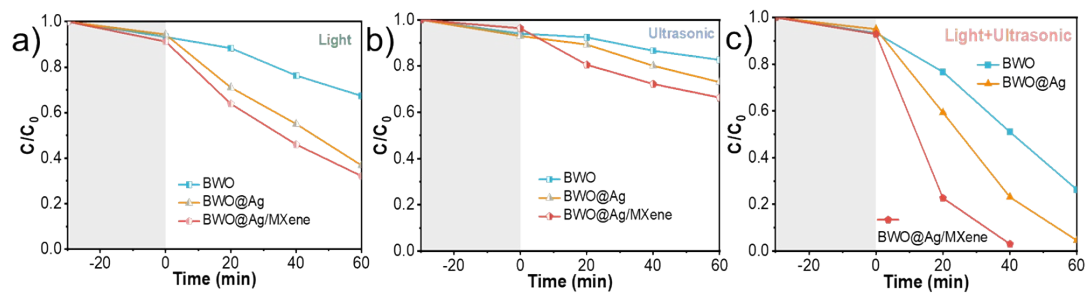

**Figure S12.** RhB degradation performance under different conditions: light illumination (a), ultrasound (b) and co-excitation of light illumination and ultrasound (c).

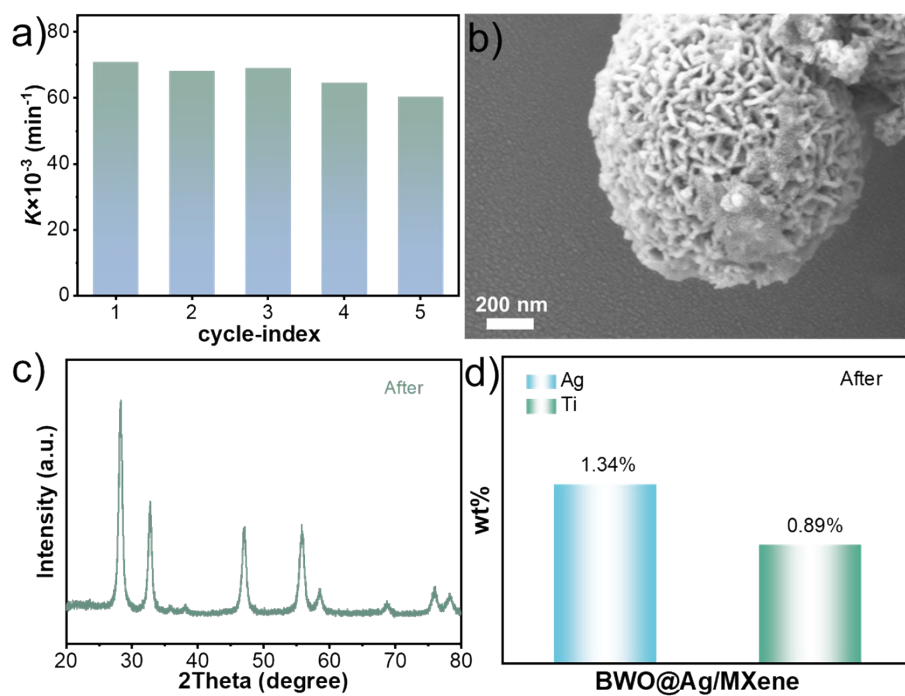

**Figure S13.** Corresponding  $k$  value within 5 degradation cycles (a), After reaction: SEM image (b), XRD (c), ICP-OES (d) of the BWO@Ag/MXene sample.



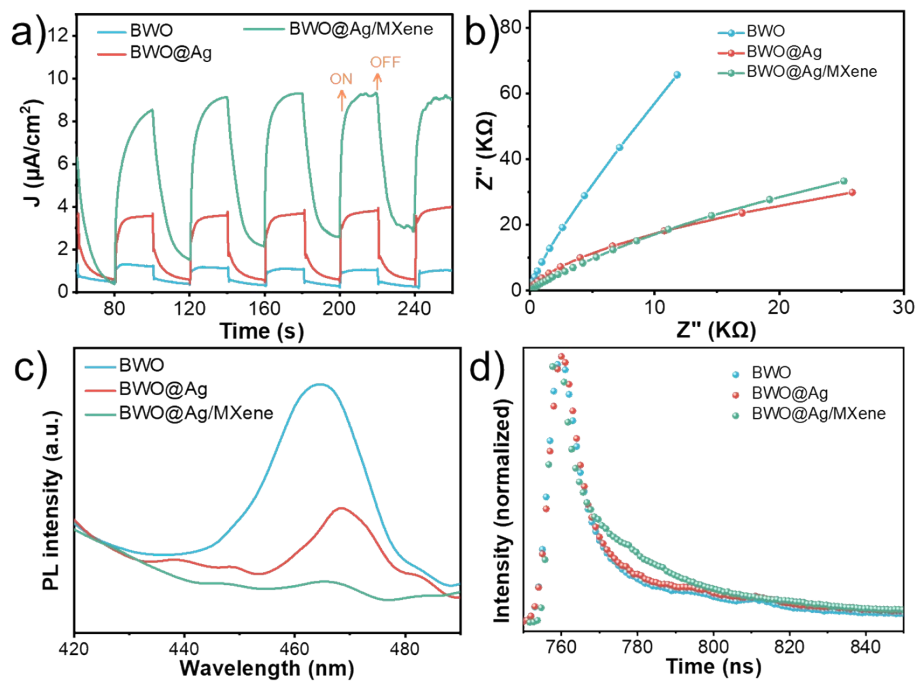

**Figure S14.** Transient photocurrent-time response curves (a), EIS (b), PL spectra (c), TRPL spectra (d) of the BWO, BWO@Ag and BWO@Ag/MXene.

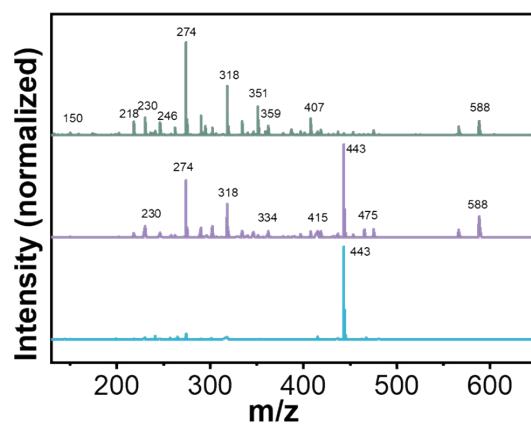

Figure S15. LC-MS of RhB degradation intermediates.

## 5 Supplementary tables

**Table S1.** Experimental conditions and first-order rate constants of reported piezoelectric materials.

| Materials                                            | Application                               | Mechanical Stress                     | Light                  | Rate constant $k$ min <sup>-1</sup> | Ref. |
|------------------------------------------------------|-------------------------------------------|---------------------------------------|------------------------|-------------------------------------|------|
| KNbO <sub>3</sub>                                    | 50 mg photocatalyst<br>RhB 10 mg/L 100 mL | Ultrasonic vibration<br>110 W, 40 kHz | 300W<br>Xe lamp        | 0.0222                              | [2]  |
| BiVO <sub>4</sub> /BiFeO <sub>3</sub>                | 100 mg photocatalyst<br>RhB 5 mg/L 50 mL  | Ultrasonic vibration<br>180 W, 40 kHz | $\lambda > 420$ nm     | 0.0357                              | [3]  |
| BaTiO <sub>3</sub> @TiO <sub>2</sub>                 | 50 mg photocatalyst<br>RhB 5 mg/L 100 mL  | Ultrasonic vibration<br>200 W, 45 kHz | 300W<br>Xe lamp        | 0.08                                | [4]  |
| Bi <sub>0.5</sub> Na <sub>0.5</sub> TiO <sub>3</sub> | 10 mg photocatalyst<br>RhB 5 mg/L 100 mL  | Ultrasonic vibration<br>200 W, 28 kHz | 300W<br>Xe lamp        | 0.094                               | [5]  |
| BiVO <sub>4</sub> :I/BTO-Ag                          | 20 mg photocatalyst<br>RhB 10 mg/L 50 mL  | Ultrasonic vibration<br>150 W, 40 kHz | $\lambda > 380$ nm     | 0.041                               | [6]  |
| Au/AgNbO <sub>3</sub>                                | 50 mg photocatalyst<br>RhB 10 mg/L 100 mL | Ultrasonic vibration<br>110 W, 40 kHz | $\lambda > 420$ nm     | 0.054                               | [7]  |
| Cl-ZnO                                               | 10 mg photocatalyst<br>RhB 1 mg/L 50 mL   | Ultrasonic vibration<br>100 W, 40 kHz | $\lambda > 350$ nm     | 0.0232                              | [8]  |
| Bi <sub>2</sub> WO <sub>6</sub>                      | 30 mg photocatalyst<br>RhB 20 mg/L 60 mL  | Ultrasonic vibration<br>120 W, 40 kHz | $\lambda = 390$ nm LED | 0.077                               | [9]  |
| Bi <sub>2</sub> WO <sub>6</sub>                      | 10 mg photocatalyst<br>RhB 5 mg/L 100 mL  | Ultrasonic vibration<br>80 W, 40 kHz  |                        | 0.039                               | [10] |

|                                                        |                                             |                                             |                           |        |      |
|--------------------------------------------------------|---------------------------------------------|---------------------------------------------|---------------------------|--------|------|
| $\text{Bi}_2\text{WO}_6$                               | 100 mg photocatalyst<br>RhB 10 mg/L 100 mL  | Ultrasonic<br>vibration<br>40 kHz           |                           | 0.004  | [11] |
| $\text{Bi}_2\text{WO}_6/\text{ZnSnO}_3$                | 100 mg photocatalyst<br>RhB 10 mg/L 100 mL  | Ultrasonic<br>vibration<br>60 W, 40<br>kHz  |                           | 0.035  | [12] |
| 1T@2H- $\text{MoS}_2/\text{Bi}_2\text{S}_3$            | 100 mg photocatalyst<br>MB 20 mg/L 50 mL    | Ultrasonic<br>vibration<br>300 W, 40<br>kHz |                           | 0.047  | [13] |
| $\text{Bi}_2\text{WO}_6/\text{B}-\text{TiO}_2$         | 20 mg photocatalyst<br>MB 10 mg/L 60 mL     | Ultrasonic<br>vibration<br>240 W            | 220W<br>Xe lamp           | 0.067  | [14] |
| 1T/2H $\text{MoSe}_2/\text{Bi}_2\text{WO}_6$           | 10 mg photocatalyst<br>DCF 30 mL            | Ultrasonic<br>vibration<br>240 W, 40<br>kHz | 220 V,<br>35W Xe<br>lamp  | ~0.021 | [15] |
| $\text{Bi}_2\text{WO}_6$                               | 100 mg photocatalyst<br>RhB, 5 mg/L 100 mL  | Ultrasonic<br>vibration<br>120 W, 40<br>kHz |                           | 0.031  | [16] |
| MXene                                                  | 10 mg photocatalyst<br>RhB, 10 mg/L 20 mL   | Ultrasonic<br>vibration<br>300 W, 40<br>kHz |                           | 0.007  | [17] |
| $\text{Ti}_3\text{C}_2@\text{MoS}_2$                   | 4 g photocatalyst<br>BPA, 10 mg/L 40 mL     | Ultrasonic<br>vibration                     |                           | 0.095  | [18] |
| $\text{Ti}_3\text{C}_2/\text{SAMS-X}$                  | 10 mg photocatalyst<br>BPA, 10 mg/L 20 mL   | Ultrasonic<br>vibration<br>600 W, 45<br>kHz |                           | 0.035  | [19] |
| $\text{g-C}_3\text{N}_4/\text{Ag}/\text{ZnO}$          | 50 mg photocatalyst<br>RhB, 10 mg/L 50 mL   | Ultrasonic<br>vibration                     | LED                       | 0.019  | [20] |
| $\text{BiOI}/\text{BaTiO}_3$                           | 100 mg photocatalyst<br>RhB, 50 mg/L 100 mL | Ultrasonic<br>vibration<br>180 W, 40<br>kHz | 300W<br>Xe lamp           | 0.179  | [21] |
| Ag NPs/ $\text{g-C}_3\text{N}_4/\text{Ti}_3\text{C}_2$ | 100 mg photocatalyst<br>RhB 10 mg/L 100 mL  |                                             | $\lambda=780-$<br>2500 nm | 0.047  | [22] |
| $\text{K}_x\text{Ag}_{1-x}\text{NbO}_3$                | 50 mg photocatalyst<br>RhB 10 mg/L 120 mL   | Ultrasonic<br>vibration<br>240 W, 40        | 300W<br>Xe lamp           | 0.131  | [23] |

|                                                            |                                            |                                                    |                       |       |              |
|------------------------------------------------------------|--------------------------------------------|----------------------------------------------------|-----------------------|-------|--------------|
| $\text{Bi}_{0.5}\text{Na}_{0.5}\text{TiO}_3@\text{BiVO}_4$ | 100 mg photocatalyst<br>RhB 10 mg/L 100 mL | kHz<br>Ultrasonic<br>vibration<br>200 W, 48<br>kHz | 300W<br>Xe lamp       | 0.045 | [24]         |
| Au/AgNbO <sub>3</sub>                                      | 50 mg photocatalyst<br>RhB 10 mg/L 100 mL  | kHz<br>Ultrasonic<br>vibration<br>110 W, 40<br>kHz | $\lambda > 420$<br>nm | 0.054 | [25]         |
| BaTiO <sub>3</sub> @TiO <sub>2</sub>                       | 50 mg photocatalyst<br>RhB 5 mg/L 100 mL   | kHz<br>Ultrasonic<br>vibration<br>200 W, 45<br>kHz | 300W<br>Xe lamp       | 0,08  | [26]         |
| BWO@Ag/MXene                                               | 20 mg photocatalyst<br>RhB 10 mg/L 50 mL   | kHz<br>Ultrasonic<br>vibration<br>100 W, 40<br>kHz | $\lambda > 380$<br>nm | 0.072 | This<br>work |

---

**Table S2.** Possible degradation intermediates of RhB.

| Proposed structure                                                                  | Measured (m/z) | Proposed structure                                                                  | Measured (m/z) |
|-------------------------------------------------------------------------------------|----------------|-------------------------------------------------------------------------------------|----------------|
| 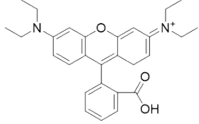   | 443            |   | 379            |
|    | 415            |   | 196            |
|    | 415            |   | 274            |
|    | 459            |   | 230            |
|   | 359            |  | 230            |
|  | 359            |                                                                                     |                |

## References

- 1 B. J. Wang, S. K. Li, F. Z. Huang, S. P. Wang, H. Zhang, F. H. Liu and Q. C. Liu, *Carbon*, 2022, **187**, 56-66.
- 2 D. F. Yu, Z. H. Liu, J. M. Zhang, S. Li, Z. C. Zhao, L. F. Zhu, W. S. Liu, Y. H. Lin, H. Liu and Z. T. Zhang, *Nano Energy*, 2019, **58**, 695-705.
- 3 Q. F. Jing, Z. Y. Liu, X. Cheng, C. C. Li, P. R. Ren, K. Guo, H. J. Yue, B. Xie, T. Li, Z. G. Wang and L. L. Shu, *Chem. Eng. J.*, 2023, **464**, 142617.
- 4 Q. Liu, D. Zhai, Z. D. Xiao, C. Tang, Q. W. Sun, C. R. Bowen, H. Luo and D. Zhang, *Nano Energy*, 2022, **92**, 106702.
- 5 X. F. Zhou, Q. W. Sun, D. Zhai, G. L. Xue, H. Luo and D. Zhang, *Nano Energy*, 2021, **84**, 105936.
- 6 X. F. Zhou, B. Shen, J. W. Zhai and N. Hedin, *Adv. Funct. Mater.*, 2021, **31**, 2009594.
- 7 S. Li, Z. C. Zhao, M. S. Liu, X. B. Liu, W. Huang, S. K. Sun, Y. H. Jiang, Y. Liu, J. M. Zhang and Z. T. Zhang, *Nano Energy*, 2022, **95**, 107031.
- 8 J. Yuan, X. Y. Huang, L. L. Zhang, F. Gao, R. Lei, C. K. Jiang, W. H. Feng and P. Liu, *Appl. Catal. B- Environ.*, 2020, **278**, 119291.
- 9 Z. Y. Jiang, X. J. Tan, J. Y. Xu and Y. X. Huang, *ACS Appl. Nano Mater.*, 2022, **5**, 7588-7597.
- 10 Z. Kang, N. Qin, E. Z. Lin, J. Wu, B. W. Yuan and D. H. Bao, *J. Clean Prod.*, 2020, **261**, 121125.
- 11 C. C. Lei, L. M. Song and S. J. Zhang, *Ceram. Int.*, 2020, **46**, 29344-29351.
- 12 C. R. Zhao, L. Y. Cai, K. Q. Wang, B. X. Li, S. D. Yuan, Z. H. Zeng, L. H. Zhao, Y. Wu and Y. M. He, *Environ. Pollut.*, 2023, **319**, 120982.
- 13 J. Y. Yue, R. Wu, Y. Zhang, N. Zhang, H. T. Jing, S. H. Wei and F. P. Ouyang, *Appl. Surf. Sci.*, 2023, **623**, 157033.
- 14 W. J. Shen, N. Li, S. X. Zuo, M. M. Wu, G. F. Sun, Q. F. Li, M. H. Shi and J. Q. Ma, *Ceram. Int.*, 2022, **48**, 15899-15907.
- 15 G. F. Sun, N. Li, S. X. Zuo, W. J. Shen, M. M. Wu, Q. F. Li, M. H. Shi and J. Q. Ma, *Ceram. Int.*, 2022, **48**, 37242-37252.
- 16 Z. H. Kang, E. Z. Lin, N. Qin, J. Wu, B. W. Yuan and D. H. Bao, *Environ. Sci.-Nano*, 2021, **8**, 1376-1388.
- 17 S. N. Lai, W. Y. Chen, C. C. Yen, Y. S. Liao, P. H. Chen, L. Stanciu and J. M. Wu, *J. Mater. Chem. A*, 2024, **12**, 3340-3351.
- 18 T. T. Ren, J. Han, Y. Miao, N. J. Li, D. Y. Chen, Q. F. Xu, H. Li and J. M. Lu, *J. Alloy. Compd.*, 2022, **925**, 166638.
- 19 S. X. Wang, W. R. Tian, J. Han, N. J. Li, D. Y. Chen, Q. F. Xu, H. Li and J. M. Lu, *ACS Appl. Mater. Interfaces*, 2023, **15**, 55129-55138.
- 20 P. P. Gotipamul, G. Vattikondala, K. D. Rajan, S. Khanna, M. Rathinam and S. Chidambaram, *Chemosphere*, 2022, **287**, 132298.
- 21 G. Y. Liu, H. L. Fei, Z. Feng, Q. Shao, T. Z. Zhao, W. Y. Guo and F. Li, *J. Clean Prod.*, 2024, **440**, 140886.
- 22 P. P. Gotipamul, G. Vattikondala, K. D. Rajan, S. Khanna, M. Rathinam and S. Chidambaram, *Chemosphere*, 2022, **287**, 132298..
- 23 Y. Zhang, N. N. Luo, D. Q. Zeng, C. Xu, L. Ma, G. G. Luo, Y. X. Qian, Q. Feng, X. Y. Chen, C. Z. Hu, L. J. Liu, T. Fujita and Y. Z. Wei, *ACS Appl. Mater. Interfaces*, 2022, **14**, 22313-22323.
- 24 Q. Liu, Q. Hu, D. Zhai, Q. W. Sun, H. Luo and D. Zhang, *J. Mater. Chem. A*, 2021, **9**, 17841-17854.
- 25 S. Li, Z. C. Zhao, M. S. Liu, X. B. Liu, W. Huang, S. K. Sun, Y. H. Jiang, Y. Liu, J. M. Zhang and Z. T. Zhang, *Nano Energy*, 2022, **95**, 107031.

26 Q. Liu, D. Zhai, Z. D. Xiao, C. Tang, Q. W. Sun, C. R. Bowen, H. Luo and D. Zhang, *Nano Energy*, 2022, **92**, 106702.
